# Supplementary material for: Identification of Flavonoids from Scutellaria barbata D. Don as Inhibitors of HIV-1 and Cathepsin L Proteases and Their Structure–Activity Relationships
Source: MDPI journal article supplement (doi:10.3390/molecules28114476), 2023-05-31

Qualitative and Quantitative of  
flavonoids from *Scutellaria barbata* D. Don  
Extracts

| RT(min) | Name         | BW              | B30   | B60   | B80   |
|---------|--------------|-----------------|-------|-------|-------|
|         |              | Content (µg/mg) |       |       |       |
| 6.11    | Scutellarin  | 25.18           | 23.53 | 30.35 | 22.49 |
| 8.77    | Scutellarein | 1.17            | 1.97  | 0.74  | 1.04  |
| 9.24    | Luteolin     | 0.04            | 0.12  | 0.09  | 0.14  |
| 12.51   | Apigenin     | 0.10            | 0.15  | 0.16  | 0.29  |
| 12.65   | Hispidulin   | 1.04            | 1.72  | 1.71  | 1.78  |

RT: 0.00 - 20.00

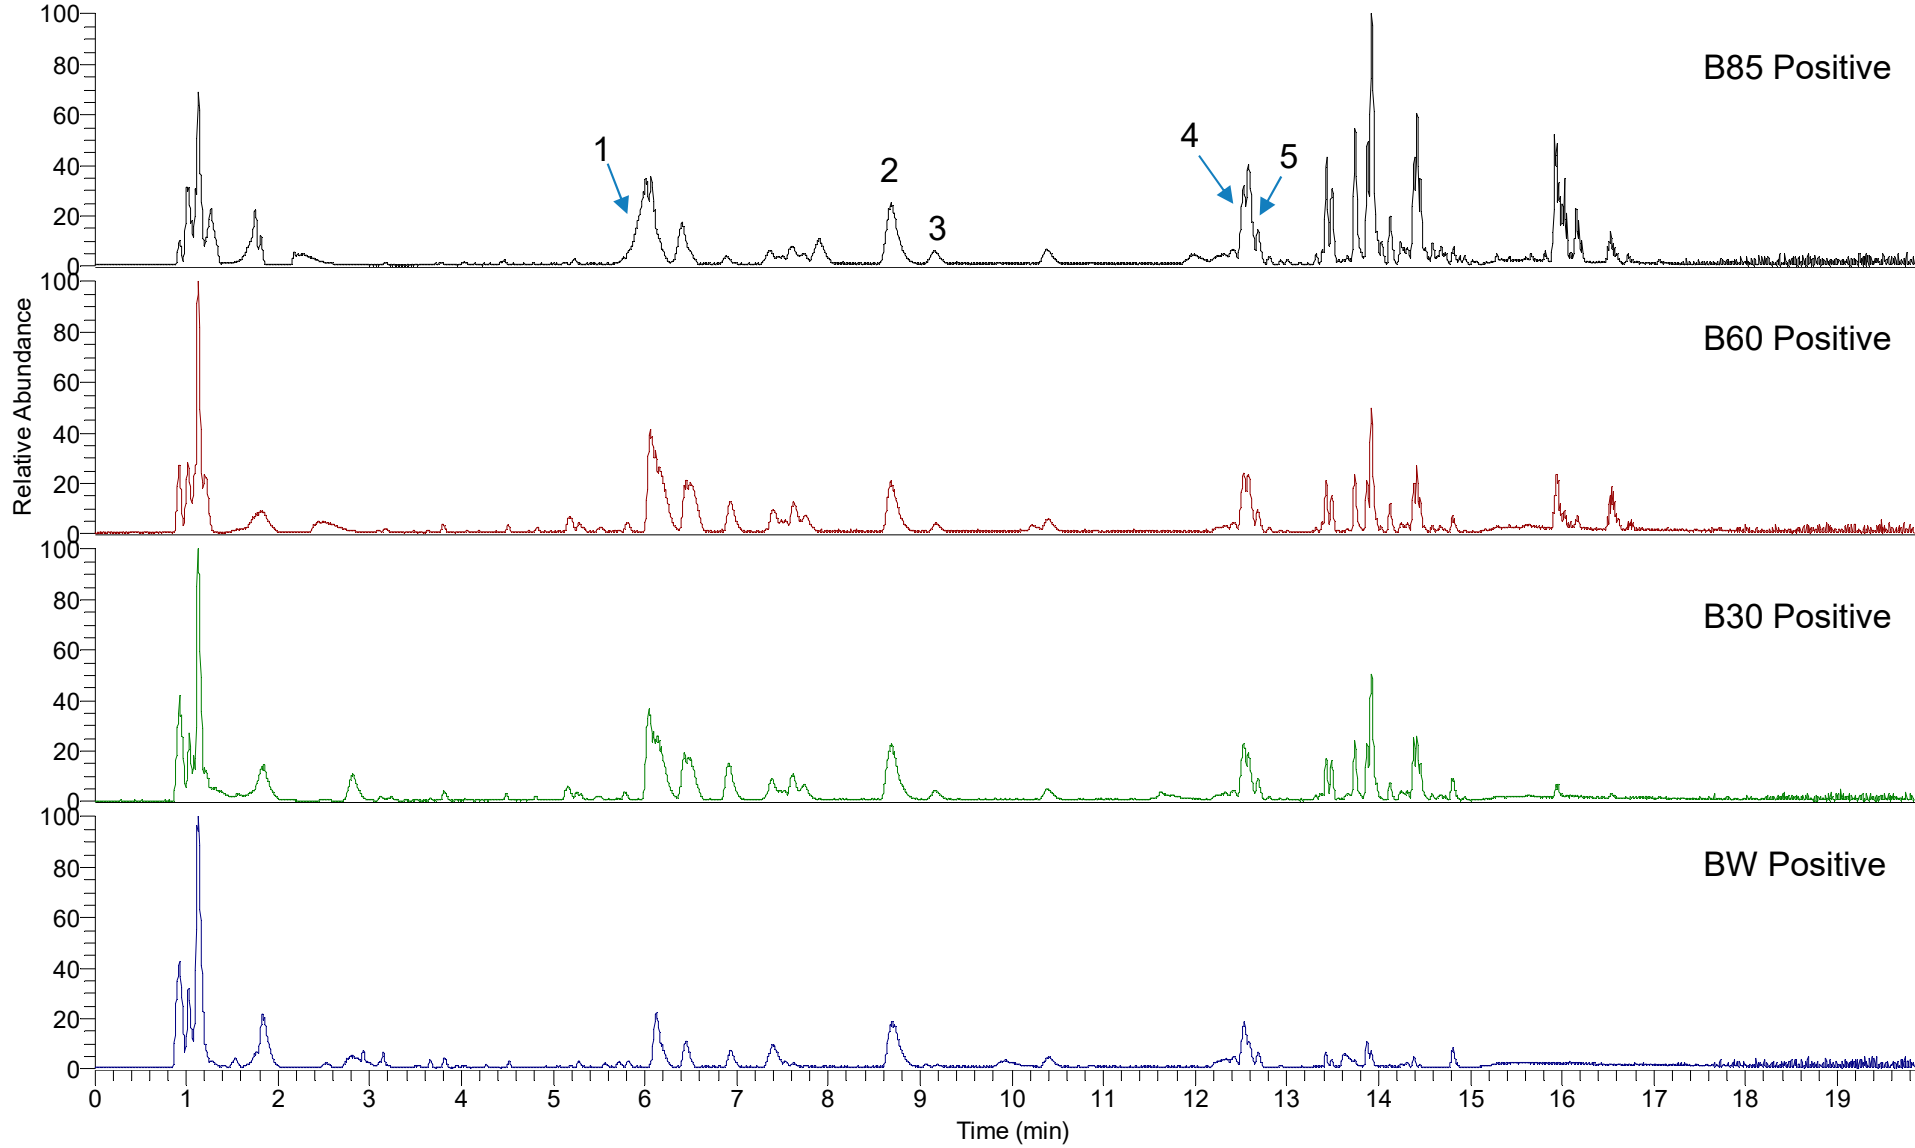

RT: 0.00 - 20.00

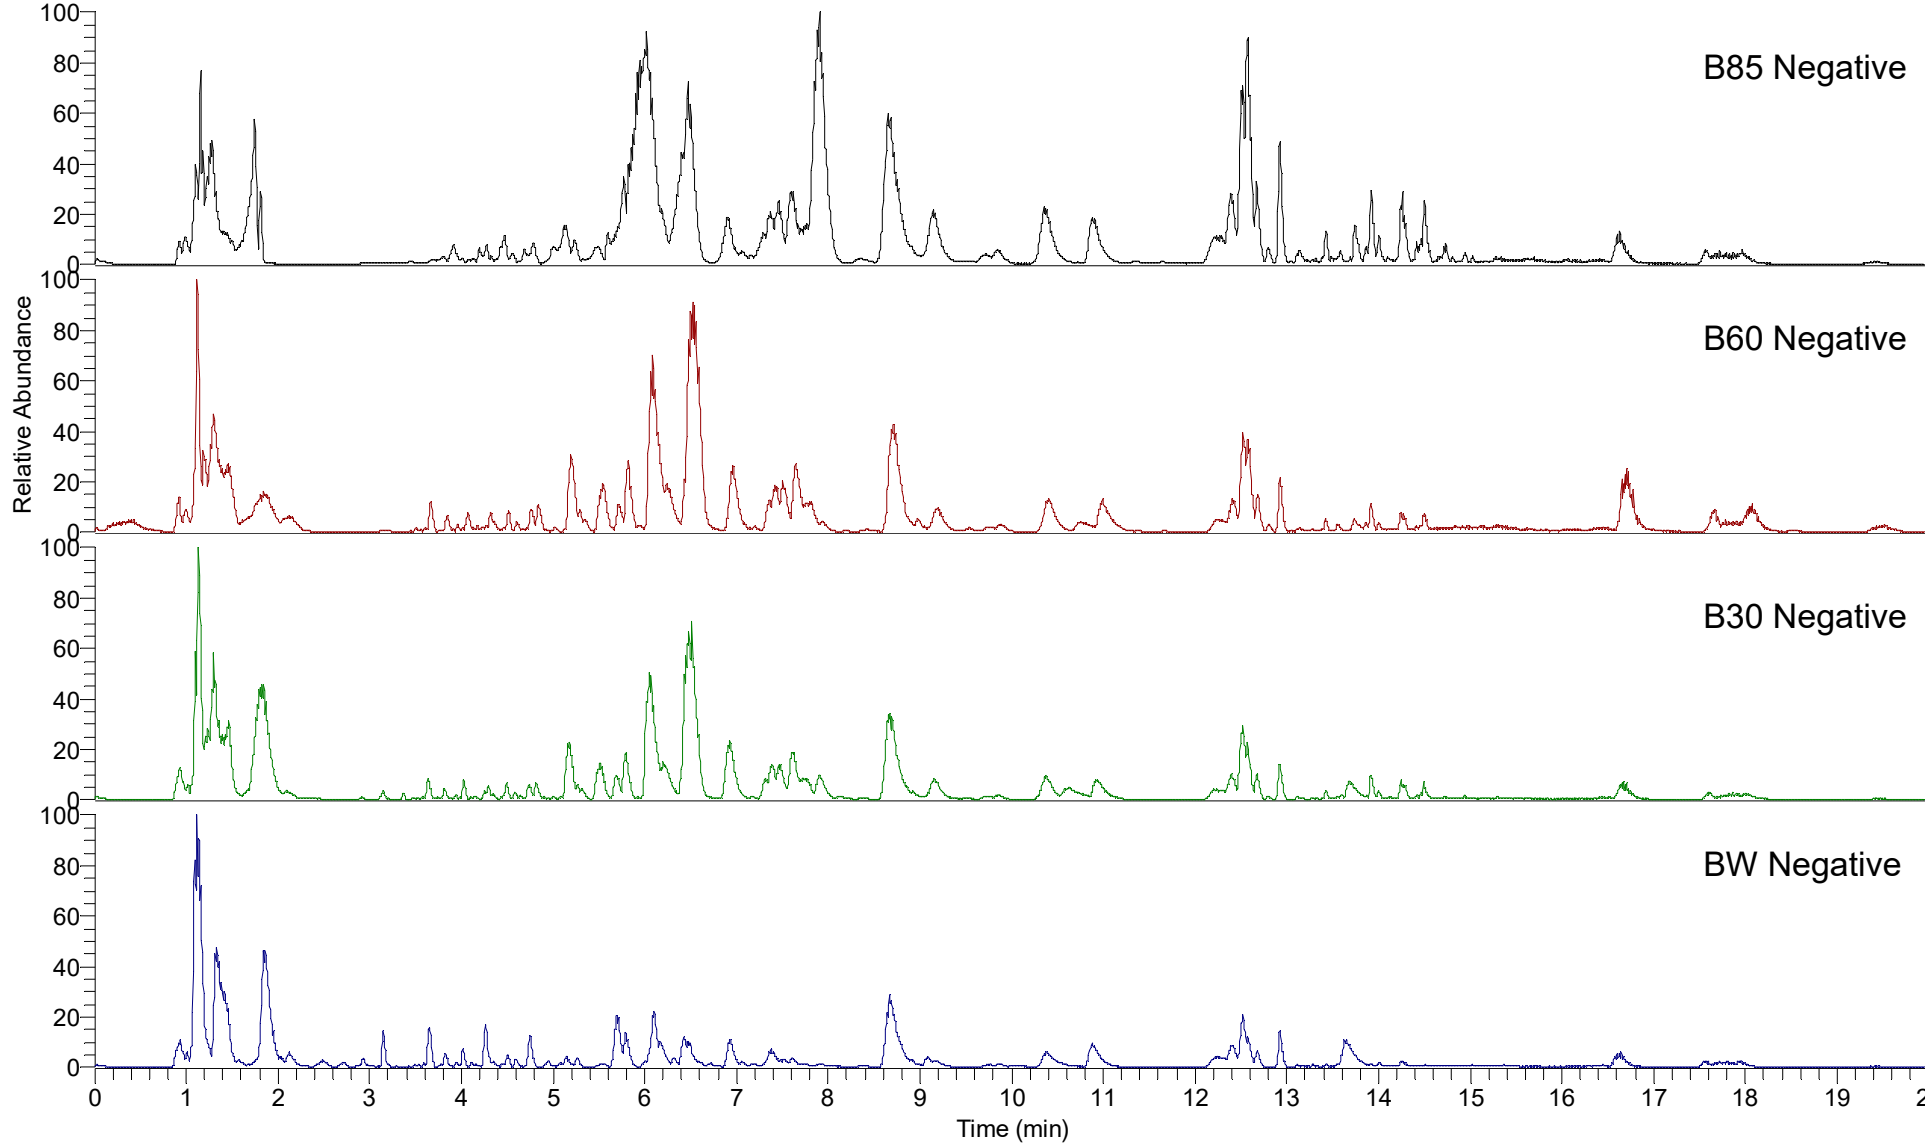

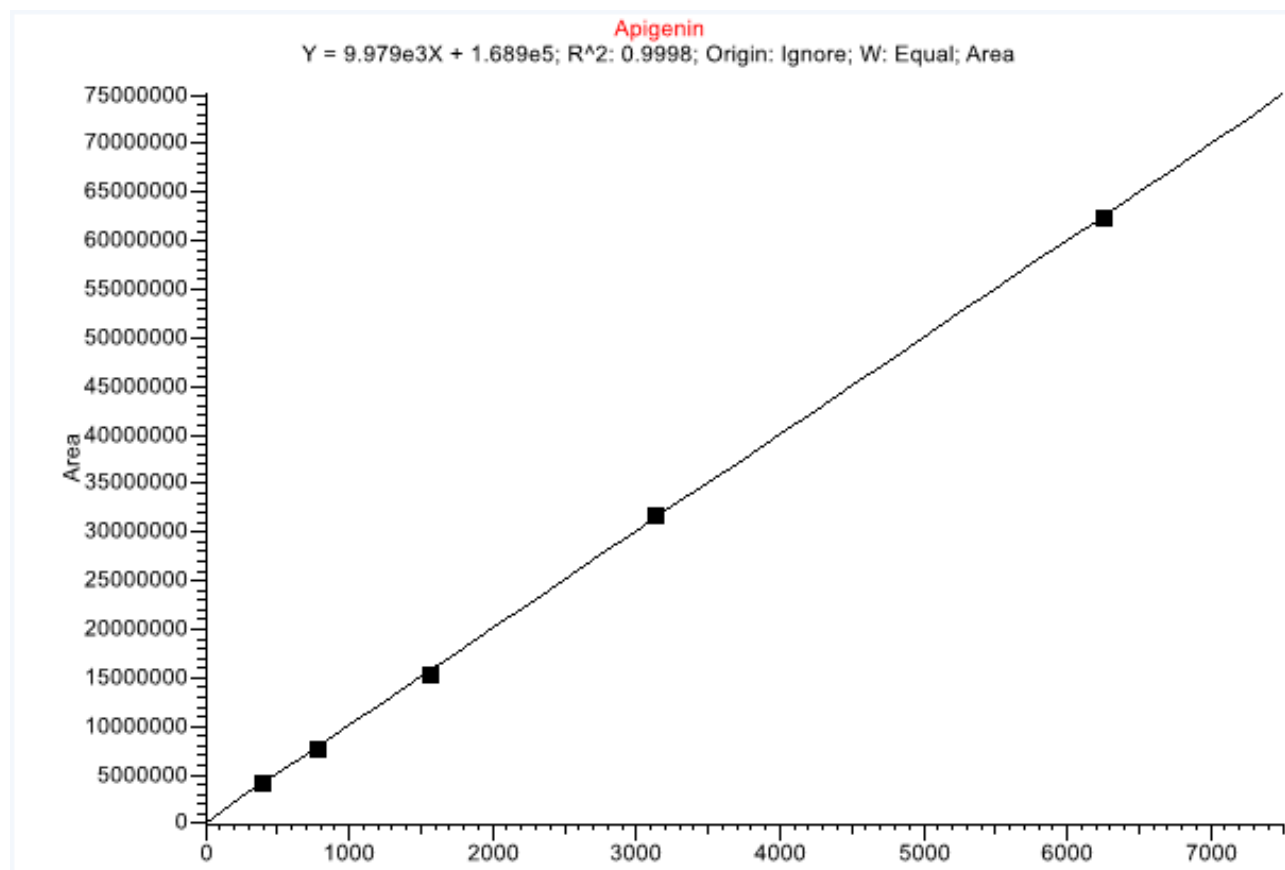

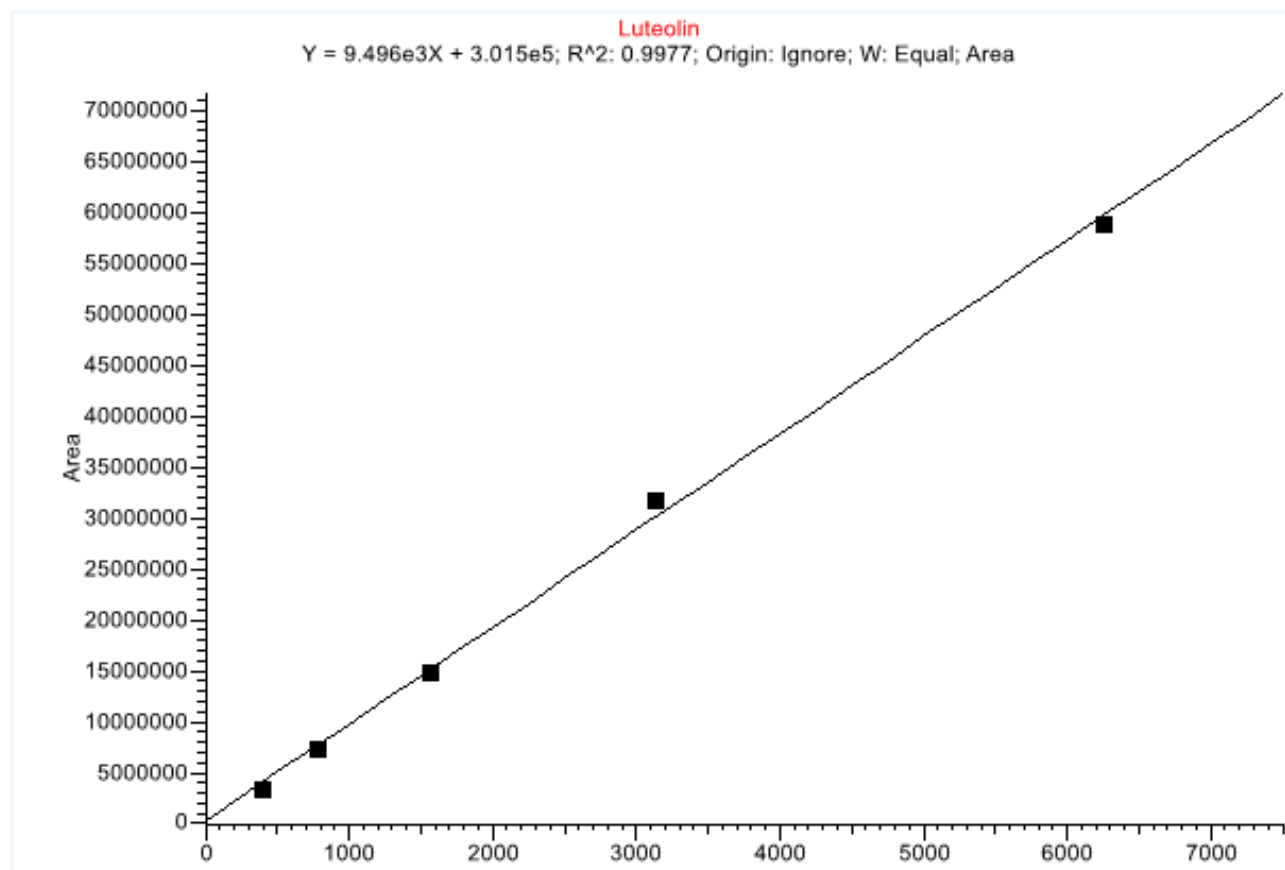

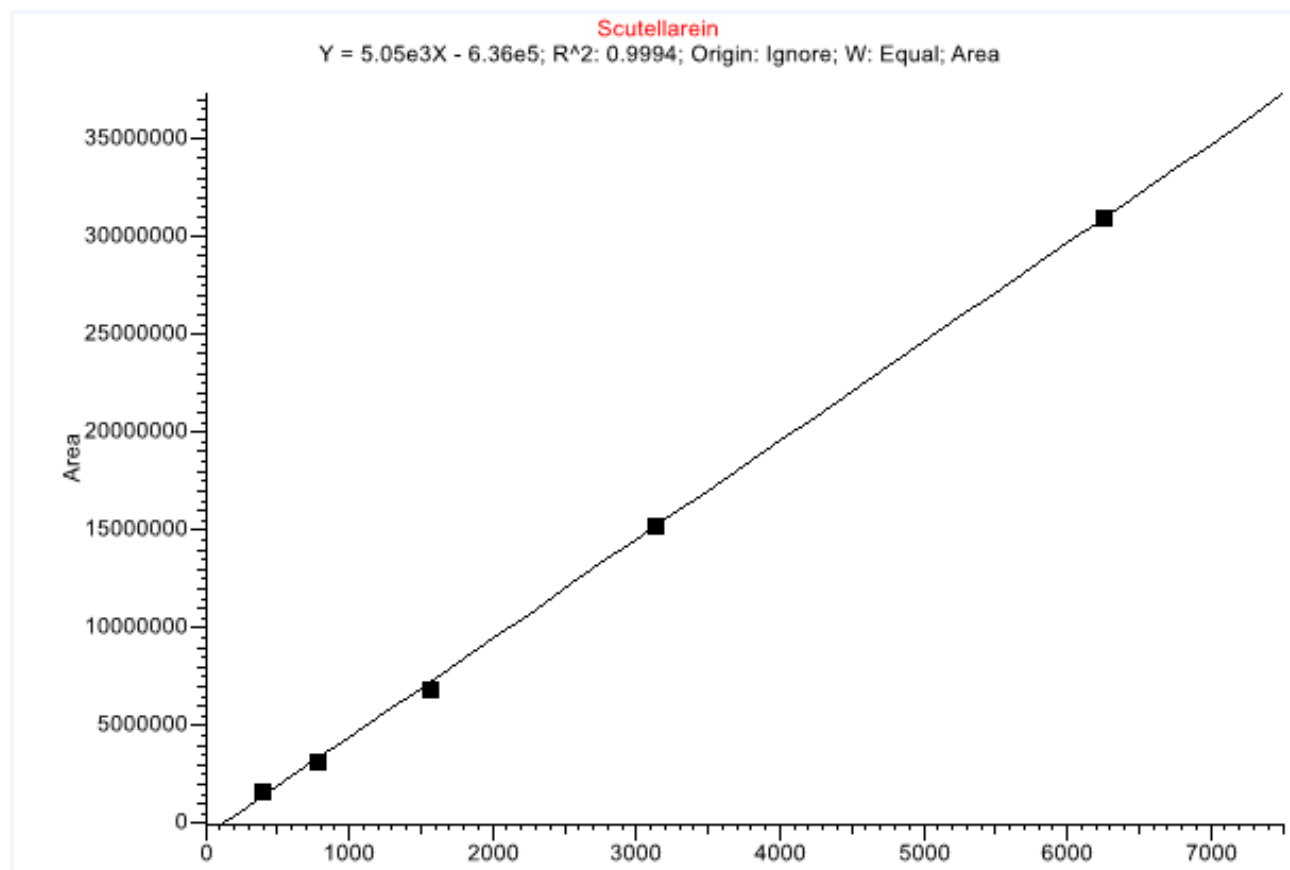

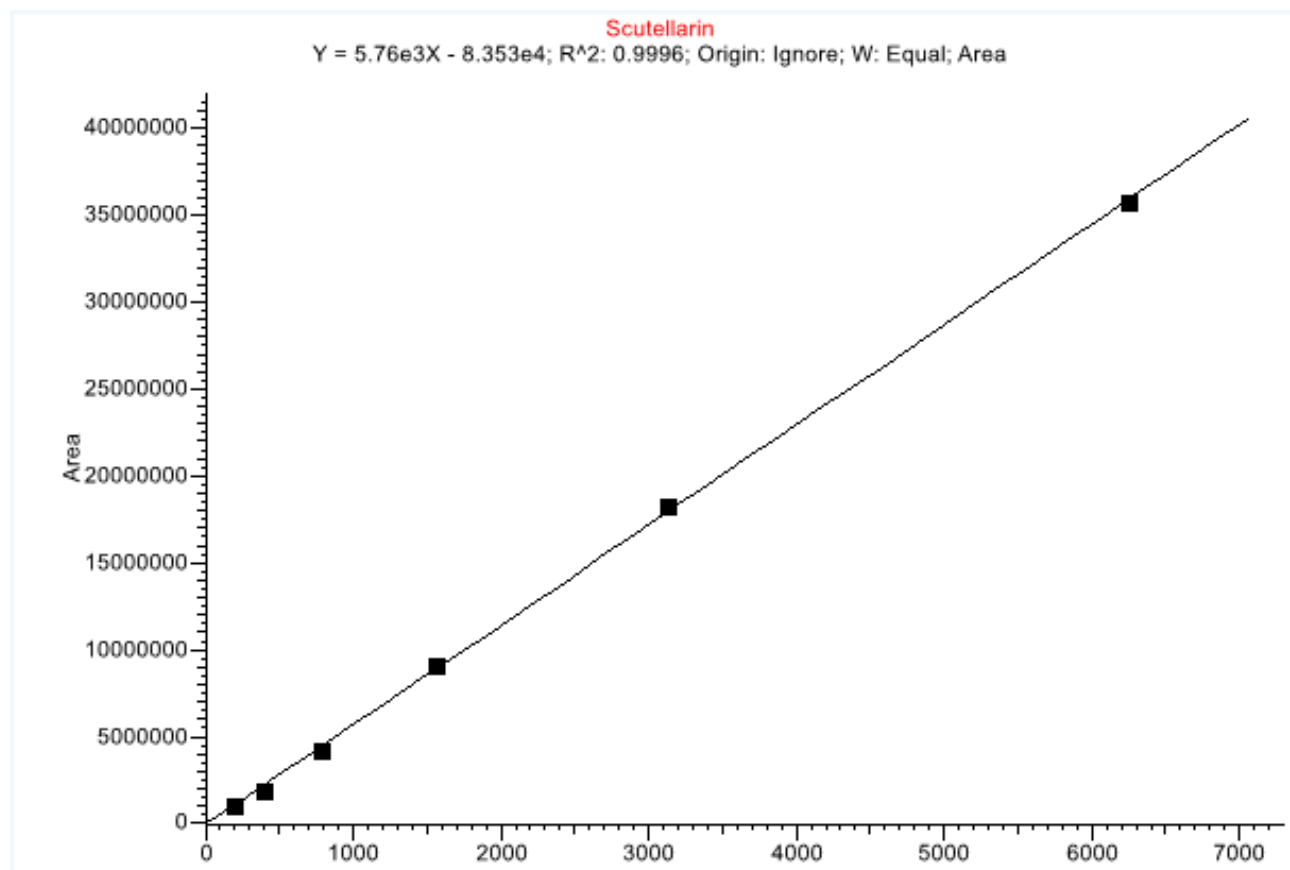



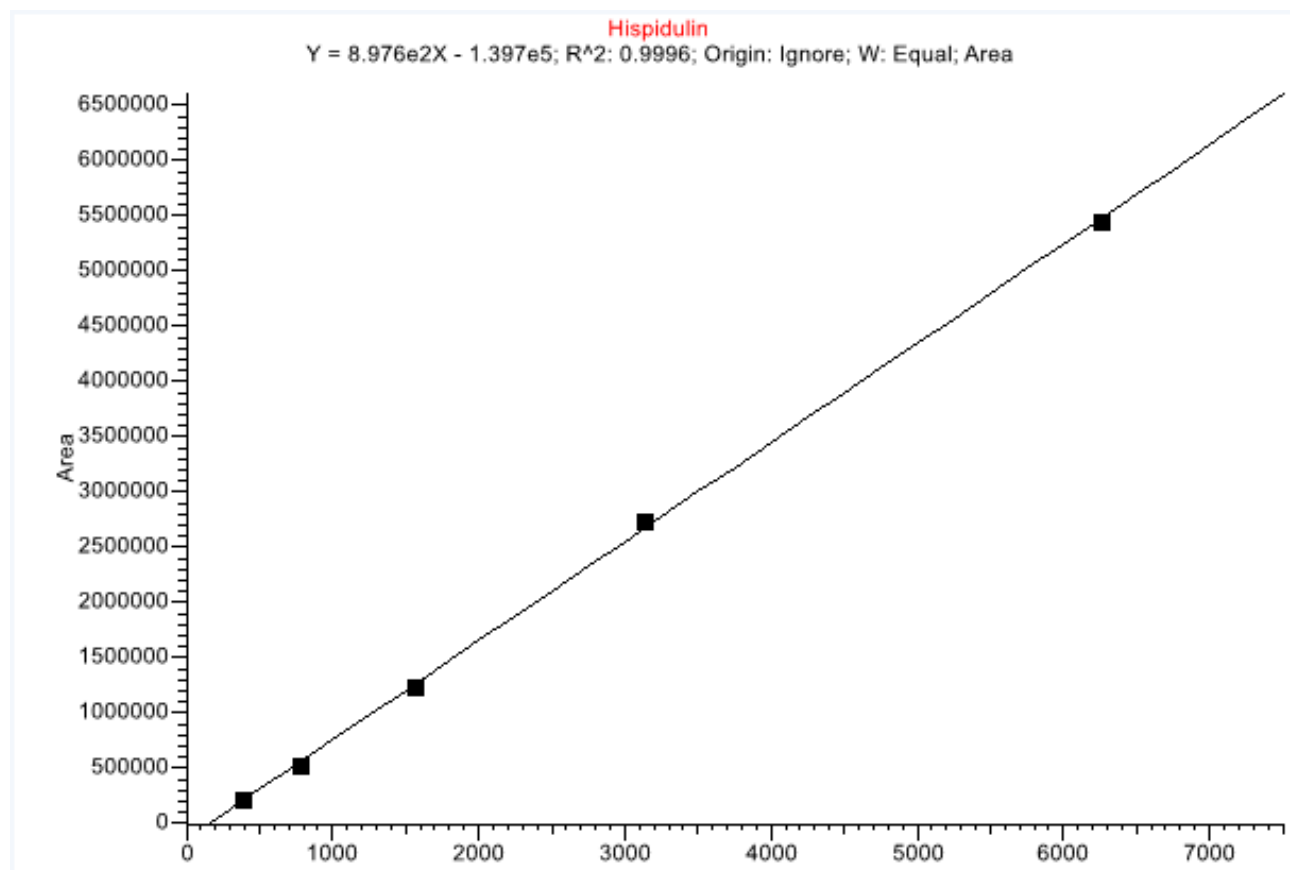

Supplement: s1 [file s1]
