# Supplementary material for: Identification of Flavonoids from Scutellaria barbata D. Don as Inhibitors of HIV-1 and Cathepsin L Proteases and Their Structure–Activity Relationships
Source: MDPI journal article supplement (doi:10.3390/molecules28114476), 2023-05-31

1. Four extracts of *Scutellaria barbata* D. Don against Cat L PR (n=3)

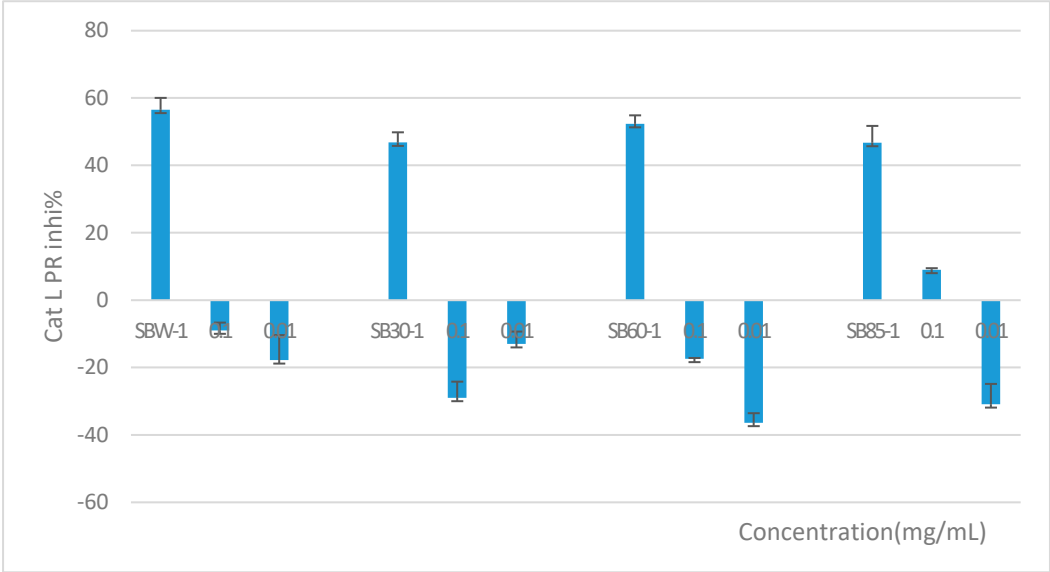

2. Four extracts of *Scutellaria barbata* D. Don against HIV-1 PR (n=3)

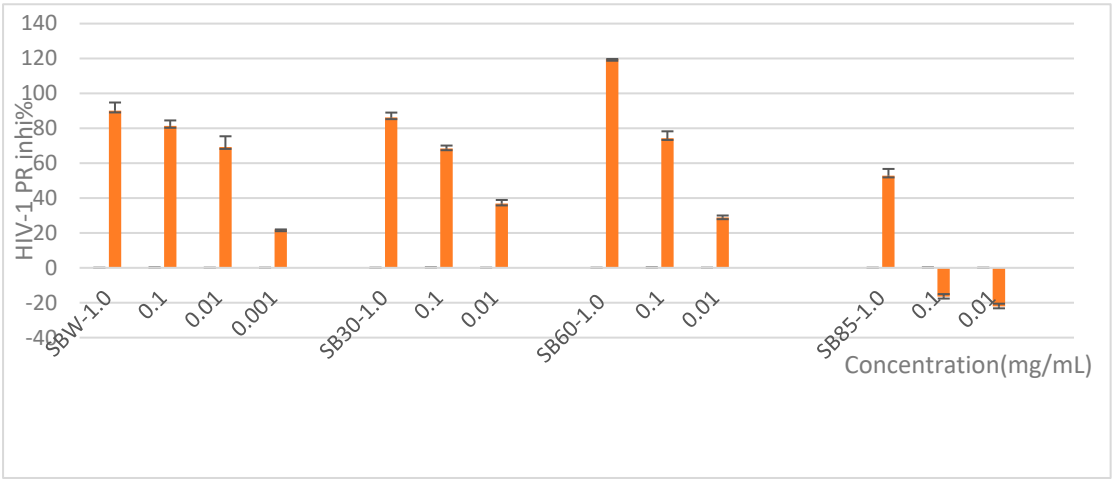

3. Four extracts of *Scutellaria barbata* D. Don against Renin PR (n=3)

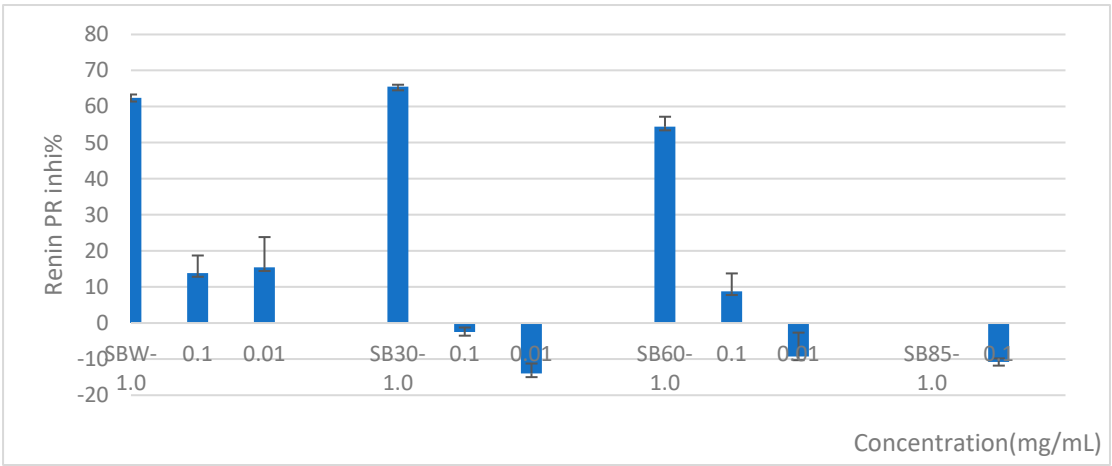

4. Luteolin, Scutellarein and Hispidulin inhibit HIV-1 PR (n=3)

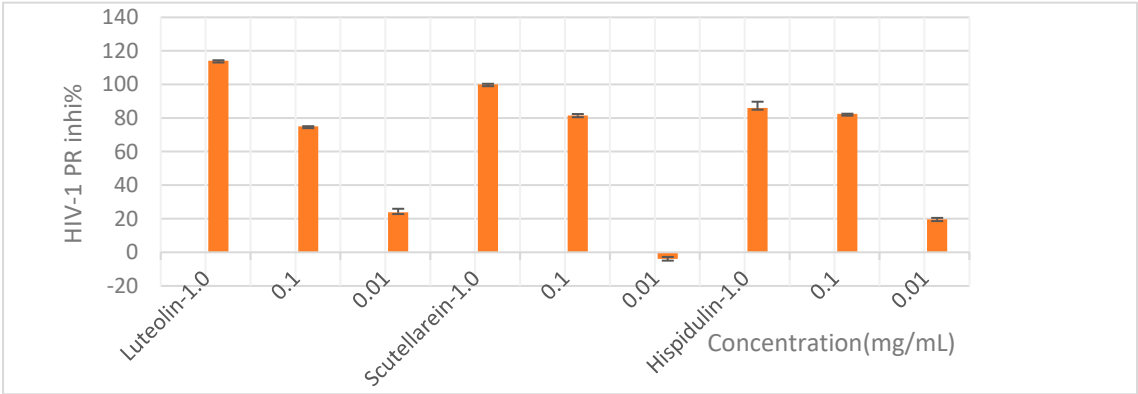

5. Scutellarein, Apigenin and Hispidulin inhibit Cat L PR (n=3)

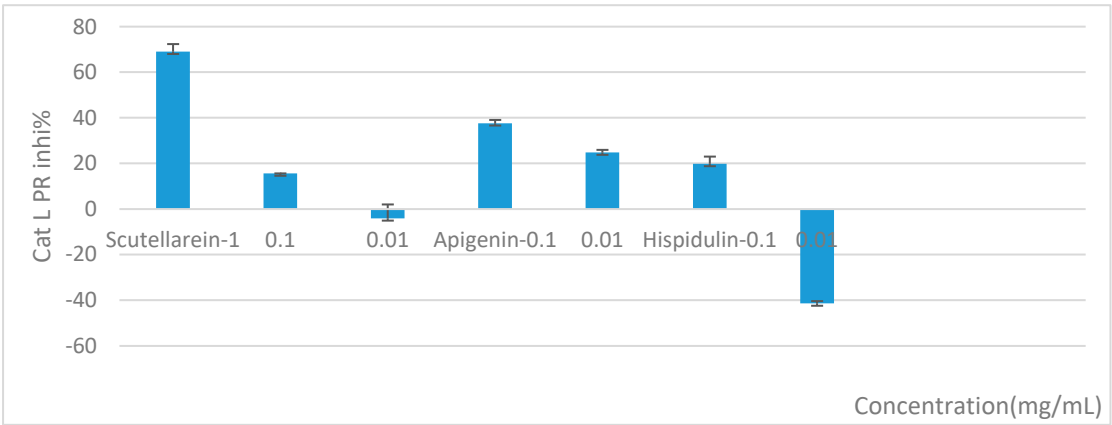

Supplement: s1 [file s1]
